# Supplementary material for: The Effect of Various Polyhedral Oligomeric Silsesquioxanes on Viscoelastic, Thermal Properties and Crystallization of Poly(ε-caprolactone) Nanocomposites
Source: MDPI journal article supplement (doi:10.3390/polym14235078), 2022-11-23
Supplement: s1 [file s1]

# The effect of polyhedral oligomeric silsesquioxanes on viscoelastic, thermal properties and crystallization of poly( $\epsilon$ -caprolactone) nanocomposites.

Magdalena Lipińska <sup>1\*</sup>

<sup>1</sup> Lodz University of Technology; Institute of Polymer and Dye Technology  
magdalena.lipinska@p.lodz.pl

\* Correspondence: magdalena.lipinska@p.lodz.pl

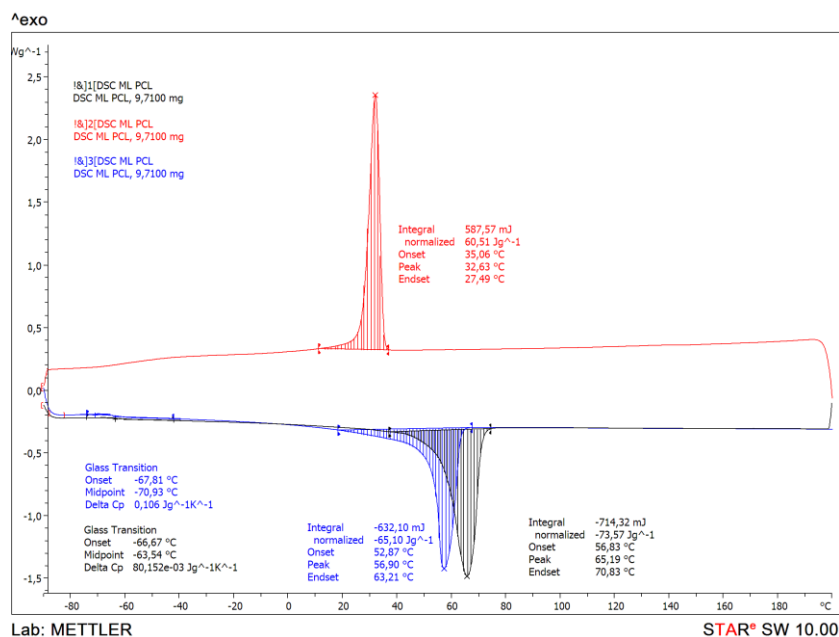

Figure S1: DSC plot for neat PCL.

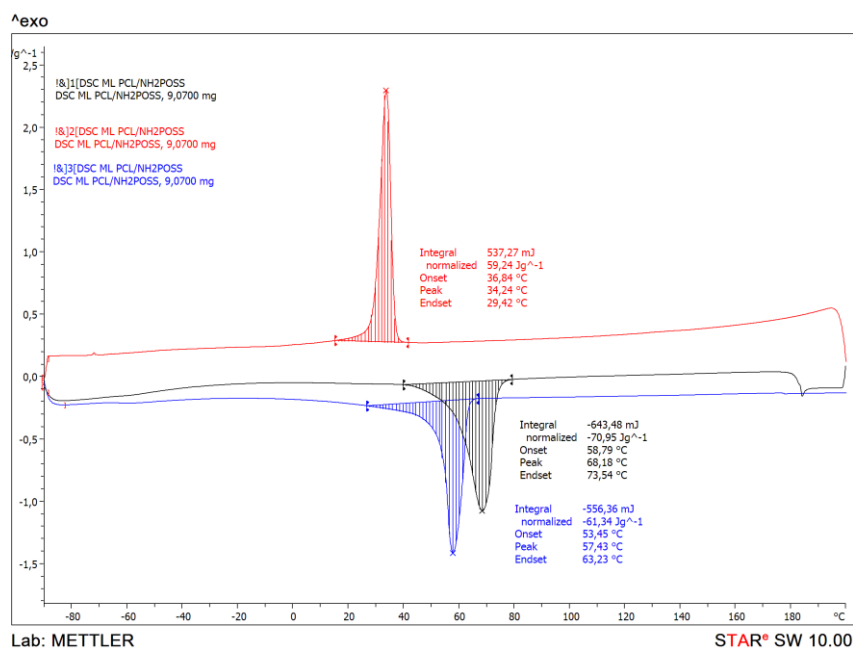

Figure S2: DSC plot for PCL amine-POSS.

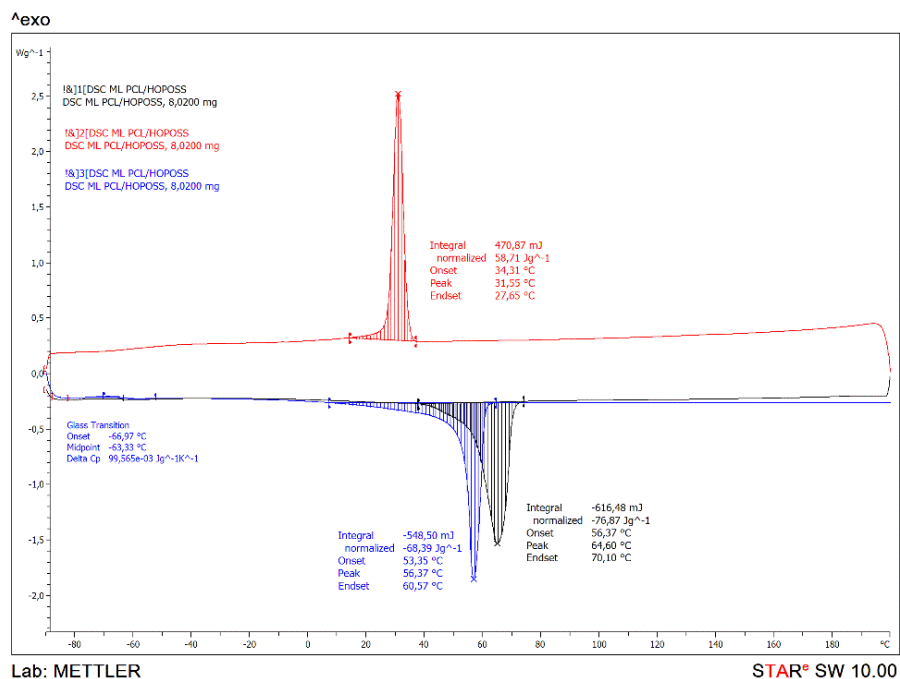

Figure S3: DSC plot for PCL HO-POSS

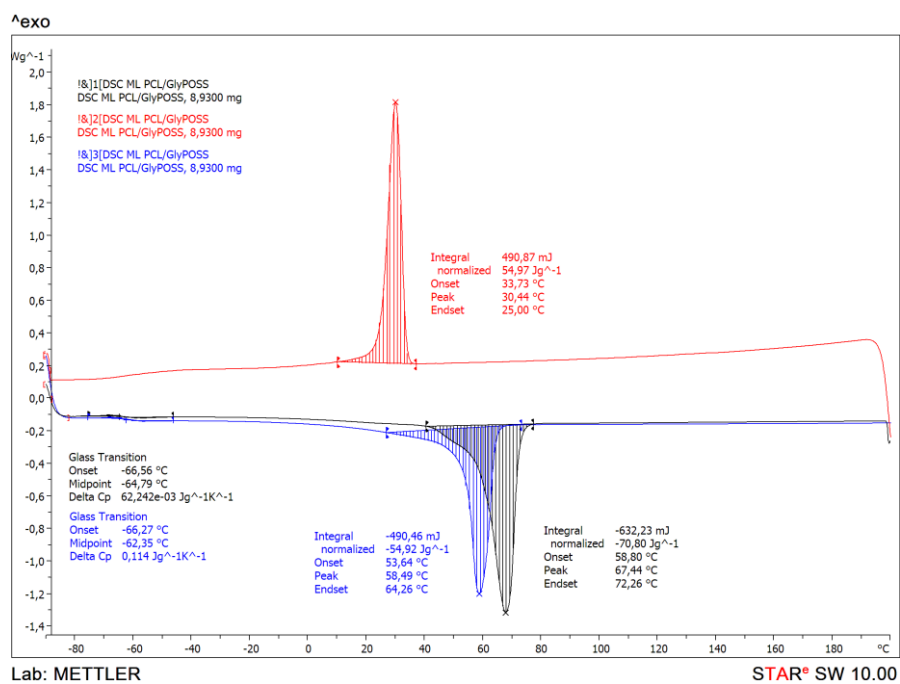

Figure S4: DSC plot for PCL Gly-POSS

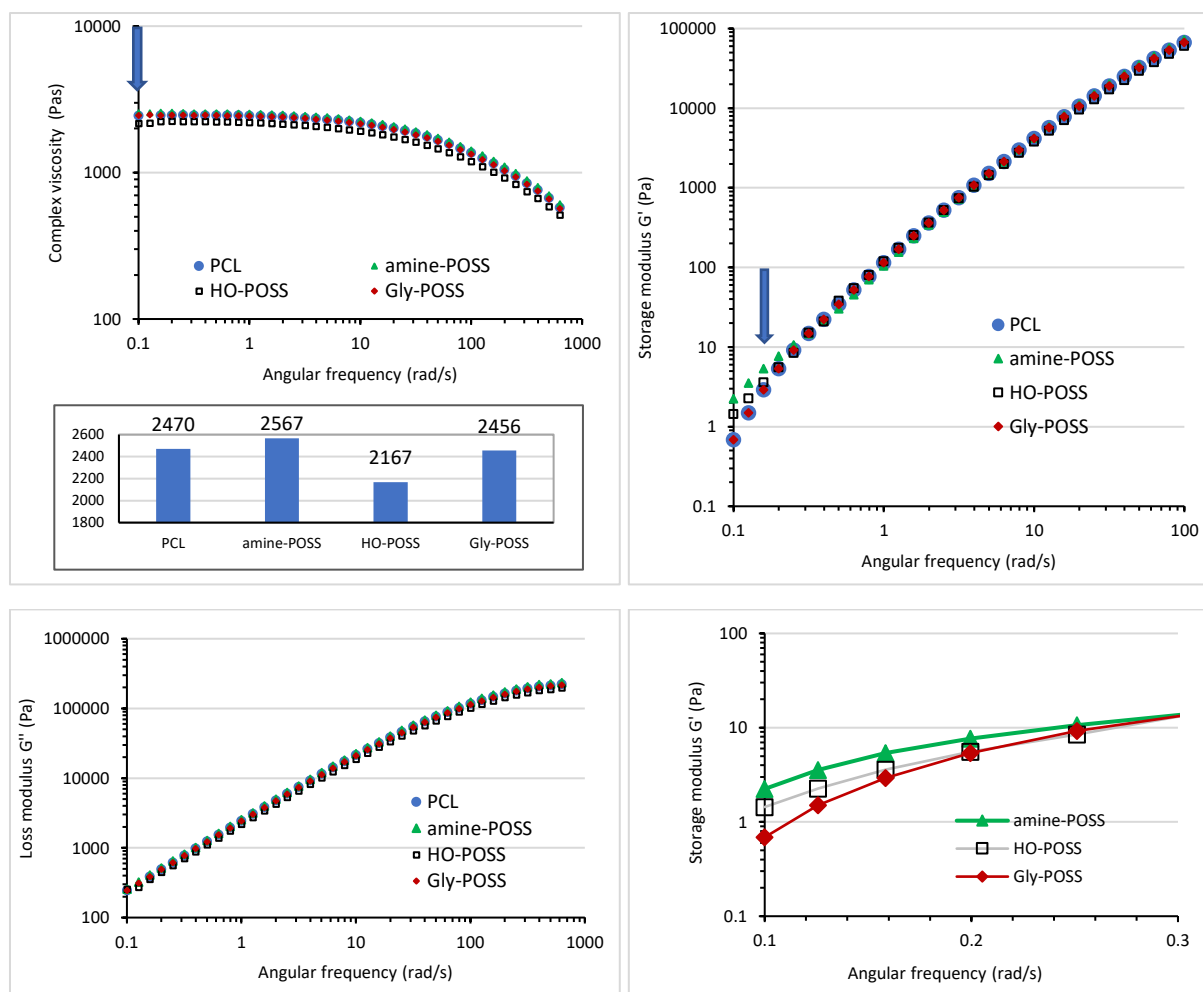

**Figure S5:** Viscoelastic properties of molten PCL modified by the addition of POSS particles, complex viscosity  $\eta^*$ , storage shear modulus  $G'$ , loss shear modulus  $G''$  at 100°C as a function of angular frequency  $\omega$  (rad·s<sup>-1</sup>), applied oscillation strain 1%.

**Table S1:** Changes in cross points  $G' = G''$  determined from frequency sweep tests measured at 100°C, oscillation shear rate 1% for samples thermally treated (100°C, air flow) during 30, 60, 90, 120 min.

| 100°C oxygen     | $G' = G''$ (kPa) | Angular frequency $\omega$ (rad·s <sup>-1</sup> ) |
|------------------|------------------|---------------------------------------------------|
| PCL              | 200.20           | 350.84                                            |
| 30 min.          | 199.23           | 346.08                                            |
| 60 min.          | 198.10           | 346.08                                            |
| 90 min.          | 197.38           | 346.55                                            |
| 120 min.         | 196.54           | 346.17                                            |
| PCL amine – POSS | 212.70           | 354.81                                            |
| 30 min.          | 210.11           | 356.21                                            |
| 60 min.          | 208.91           | 359.62                                            |
| 90 min.          | 207.66           | 362.89                                            |
| 120 min.         | 207.01           | 365.37                                            |
| PCL HO – POSS    | 176.27           | 354.74                                            |
| 30 min.          | 174.95           | 351.00                                            |
| 60 min.          | 173.65           | 350.23                                            |
| 90 min.          | 172.91           | 350.63                                            |
| 120 min.         | 172.03           | 349.84                                            |
| PCL Gly – POSS   | 197.03           | 353.24                                            |
| 30 min.          | 194.67           | 347.53                                            |
| 60 min.          | 193.02           | 346.97                                            |
| 90 min.          | 192.16           | 347.79                                            |
| 120 min.         | 191.51           | 347.72                                            |

**Table S2:** Values of relaxation modulus  $G_i$  (Pa) and relaxation times  $\lambda_i$  (s) calculated using Maxwell models for melted PCL.

|                | PCL                           |                               | PCL 30 min.                   |                               | PCL 60 min.                   |                               | PCL 120 min.                  |                               |
|----------------|-------------------------------|-------------------------------|-------------------------------|-------------------------------|-------------------------------|-------------------------------|-------------------------------|-------------------------------|
| n              | Relaxation time $\lambda$ (s) | Relaxation modulus $G_i$ (Pa) | Relaxation time $\lambda$ (s) | Relaxation modulus $G_i$ (Pa) | Relaxation time $\lambda$ (s) | Relaxation modulus $G_i$ (Pa) | Relaxation time $\lambda$ (s) | Relaxation modulus $G_i$ (Pa) |
| 1              | $3.20 \cdot 10^{-4}$          | 542499                        | $2.81 \cdot 10^{-4}$          | 531081                        | $2.75 \cdot 10^{-4}$          | 526234                        | $2.56 \cdot 10^{-4}$          | 536416                        |
| 2              | $2.75 \cdot 10^{-3}$          | 252497                        | $2.38 \cdot 10^{-3}$          | 251440                        | $2.32 \cdot 10^{-3}$          | 249510                        | $2.30 \cdot 10^{-3}$          | 254032                        |
| 3              | 0.01276                       | 67025.5                       | $8.99 \cdot 10^{-3}$          | 77550.9                       | $8.37 \cdot 10^{-3}$          | 77212.5                       | $8.69 \cdot 10^{-3}$          | 78425.6                       |
| 4              | 0.05386                       | 9993.73                       | 0.029048                      | 20962.7                       | 0.024881                      | 23781.4                       | 0.02782                       | 21666.2                       |
| 5              | 0.27599                       | 661.473                       | 0.103849                      | 2900.61                       | 0.07968                       | 4208.63                       | 0.0967                        | 3160.47                       |
| 6              | 1.79548                       | 18.3076                       | 0.439952                      | 268.218                       | 0.319187                      | 463.326                       | 0.403732                      | 300.645                       |
| R <sup>2</sup> | 0.9996                        |                               | 0.9999                        |                               | 0.9999                        |                               | 0.9999                        |                               |

**Table S3:** Values of relaxation modulus  $G_i$  (Pa) and relaxation times  $\lambda_i$  (s) calculated using Maxwell models for melted PCL amine-POSS.

|                | PCL amine-POSS                |                               | PCL amine-POSS 30 min.        |                               | PCL amine-POSS 60 min.        |                               | PCL amine-POSS 120 min.       |                               |
|----------------|-------------------------------|-------------------------------|-------------------------------|-------------------------------|-------------------------------|-------------------------------|-------------------------------|-------------------------------|
| n              | Relaxation time $\lambda$ (s) | Relaxation modulus $G_i$ (Pa) | Relaxation time $\lambda$ (s) | Relaxation modulus $G_i$ (Pa) | Relaxation time $\lambda$ (s) | Relaxation modulus $G_i$ (Pa) | Relaxation time $\lambda$ (s) | Relaxation modulus $G_i$ (Pa) |
| 1              | $3.62 \cdot 10^{-4}$          | 523724                        | $2.11 \cdot 10^{-4}$          | 645527                        | $2.56 \cdot 10^{-4}$          | 554894                        | $3.34 \cdot 10^{-4}$          | 480866                        |
| 2              | $2.82 \cdot 10^{-3}$          | 265872                        | $2.20 \cdot 10^{-3}$          | 273195                        | $2.25 \cdot 10^{-3}$          | 271005                        | $2.43 \cdot 10^{-3}$          | 259637                        |
| 3              | 0.013317                      | 67435.3                       | $7.75 \cdot 10^{-3}$          | 80540.6                       | $8.56 \cdot 10^{-3}$          | 80616.9                       | $9.99 \cdot 10^{-3}$          | 74825.4                       |
| 4              | 0.058237                      | 9218.51                       | 0.021902                      | 26771.7                       | 0.027032                      | 21806.9                       | 0.035806                      | 15836.9                       |
| 5              | 0.315852                      | 558.908                       | 0.06372                       | 5586.05                       | 0.088753                      | 3280.98                       | 0.150764                      | 1562.18                       |
| 6              | 4.6678                        | 7.41024                       | 0.229386                      | 769.591                       | 0.336022                      | 386.964                       | 0.781878                      | 79.561                        |
| R <sup>2</sup> | 0.9999                        |                               | 0.9999                        |                               | 0.9999                        |                               | 0.9999                        |                               |

**Table S4:** Values of relaxation modulus  $G_i$  (Pa) and relaxation times  $\lambda_i$  (s) calculated using Maxwell models for melted PCL HO-POSS.

|                | PCL HO-POSS                   |                               | PCL HO-POSS 30 min.           |                               | PCL HO-POSS 60 min.           |                               | PCL HO-POSS 120 min.          |                               |
|----------------|-------------------------------|-------------------------------|-------------------------------|-------------------------------|-------------------------------|-------------------------------|-------------------------------|-------------------------------|
| n              | Relaxation time $\lambda$ (s) | Relaxation modulus $G_i$ (Pa) | Relaxation time $\lambda$ (s) | Relaxation modulus $G_i$ (Pa) | Relaxation time $\lambda$ (s) | Relaxation modulus $G_i$ (Pa) | Relaxation time $\lambda$ (s) | Relaxation modulus $G_i$ (Pa) |
| 1              | $3.51 \cdot 10^{-4}$          | 418478                        | $4.60 \cdot 10^{-4}$          | 360262                        | $4.62 \cdot 10^{-4}$          | 352363                        | $4.85 \cdot 10^{-4}$          | 337305                        |
| 2              | $2.47 \cdot 10^{-3}$          | 216847                        | $2.57 \cdot 10^{-3}$          | 200211                        | $2.55 \cdot 10^{-3}$          | 199451                        | $2.54 \cdot 10^{-3}$          | 195898                        |
| 3              | $9.98 \cdot 10^{-3}$          | 66093.4                       | $9.87 \cdot 10^{-3}$          | 65163.5                       | $9.67 \cdot 10^{-3}$          | 64951.1                       | $9.55 \cdot 10^{-3}$          | 64513.2                       |
| 4              | 0.035379                      | 14301.9                       | 0.033534                      | 15231.6                       | 0.032137                      | 15688.6                       | 0.031527                      | 15984.5                       |
| 5              | 0.143364                      | 1789.7                        | 0.129298                      | 1898.81                       | 0.119075                      | 2090.52                       | 0.11799                       | 2131.34                       |
| 6              | 0.612703                      | 217.027                       | 0.52232                       | 294.669                       | 0.459565                      | 335.106                       | 0.502091                      | 327.167                       |
| R <sup>2</sup> | 0.9999                        |                               | 0.9999                        |                               | 0.9999                        |                               | 0.9999                        |                               |

**Table S5:** Values of relaxation modulus  $G_i$  (Pa) and relaxation times  $\lambda_i$  (s) calculated using Maxwell models for melted PCL Gly-POSS.

|                | PCL Gly-POSS                  |                               | PCL Gly-POSS 30 min.          |                               | PCL Gly-POSS 60 min.          |                               | PCL Gly-POSS 120 min.         |                               |
|----------------|-------------------------------|-------------------------------|-------------------------------|-------------------------------|-------------------------------|-------------------------------|-------------------------------|-------------------------------|
| n              | Relaxation time $\lambda$ (s) | Relaxation modulus $G_i$ (Pa) | Relaxation time $\lambda$ (s) | Relaxation modulus $G_i$ (Pa) | Relaxation time $\lambda$ (s) | Relaxation modulus $G_i$ (Pa) | Relaxation time $\lambda$ (s) | Relaxation modulus $G_i$ (Pa) |
| 1              | $1.59 \cdot 10^{-4}$          | 808345                        | $2.50 \cdot 10^{-4}$          | 532103                        | $2.70 \cdot 10^{-4}$          | 498055                        | $5.24 \cdot 10^{-4}$          | 357270                        |
| 2              | $2.31 \cdot 10^{-3}$          | 264878                        | $2.29 \cdot 10^{-3}$          | 255195                        | $2.30 \cdot 10^{-3}$          | 250937                        | $2.59 \cdot 10^{-3}$          | 216388                        |
| 3              | $8.03 \cdot 10^{-3}$          | 59280.6                       | $8.94 \cdot 10^{-3}$          | 78052.8                       | $8.87 \cdot 10^{-3}$          | 77138.2                       | $9.74 \cdot 10^{-3}$          | 70963.8                       |
| 4              | 0.016784                      | 28875.1                       | 0.029935                      | 20034.5                       | 0.029482                      | 20246.6                       | 0.032526                      | 17430                         |
| 5              | 0.05257                       | 9428.75                       | 0.109752                      | 2695.23                       | 0.110741                      | 2766.16                       | 0.121829                      | 2284.66                       |
| 6              | 0.285493                      | 878.338                       | 0.401028                      | 315.805                       | 0.465942                      | 294.516                       | 0.482851                      | 262.717                       |
| R <sup>2</sup> | 0.9999                        |                               | 0.9999                        |                               | 0.9999                        |                               | 0.9999                        |                               |
